# Supplementary material for: Snowpack-atmosphere gas exchanges of carbon dioxide, ozone, and nitrogen oxides at a hardwood forest site in northern Michigan
Source: Oxford University Press journal article supplement (doi:10.12952/journal.elementa.000040), 2015-01-01
Supplement: elementa_000040_s003.docx [file elementa_000040_s003.docx]

Table S1. Diffusion coefficients *D*a of trace gases used in the gradient diffusion method

| Gas species | *D* × 10-4 (m2 s-1) |
| --- | --- |
| CO2 | 0.1381 |
| O3 | 0.1444 |
| NO | 0.1361 |
| NO2 | 0.1802 |

a*D* values are from Massman (1998)
